# Supplementary material for: Shrimp Oil Extracted from Shrimp Processing By-Product Is a Rich Source of Omega-3 Fatty Acids and Astaxanthin-Esters, and Reveals Potential Anti-Adipogenic Effects in 3T3-L1 Adipocytes
Source: MDPI journal article supplement (doi:10.3390/md19050259), 2021-04-30
Supplement: s1 [file s1]

# **Shrimp oil extracted from shrimp processing by-product is a rich source of omega-3 fatty acids and astaxanthin-esters, and reveals potential anti-adipogenic effects in 3T3-L1 adipocytes**

**Indrayani Phadtare <sup>1</sup>, Hitesh Vaidya <sup>1</sup>, Kelly Hawboldt <sup>2</sup>, and Sukhinder Kaur Cheema <sup>1,\*</sup>**

<sup>1</sup> Department of Biochemistry, Memorial University of Newfoundland, St. John's, Newfoundland and Labrador, Canada A1B 3X9; [isphadtare@mun.ca](mailto:isphadtare@mun.ca) (I.P); [hbv302@mun.ca](mailto:hbv302@mun.ca) (H.V); [skaur@mun.ca](mailto:skaur@mun.ca) (S.K.C)

<sup>2</sup> Faculty of Engineering and Applied Science, Memorial University of Newfoundland, St. John's, Newfoundland and Labrador, Canada A1B3X7; [khawboldt@mun.ca](mailto:khawboldt@mun.ca) (K.H)

\*Correspondence: [skaur@mun.ca](mailto:skaur@mun.ca) (S.K.C);

Tel.: +1-709-864-3987 (S.K.C); Fax: +1-709-864-2422 (S.K.C)

## Supplementary data

### Supplementary S1

Vehicle controls had no significant effect on the mRNA expression of *Pparγ*, *Srebp1c*, *Dgat2*, *Fasn*, *Scd1* and *Glut-4*, compared to the untreated cells.

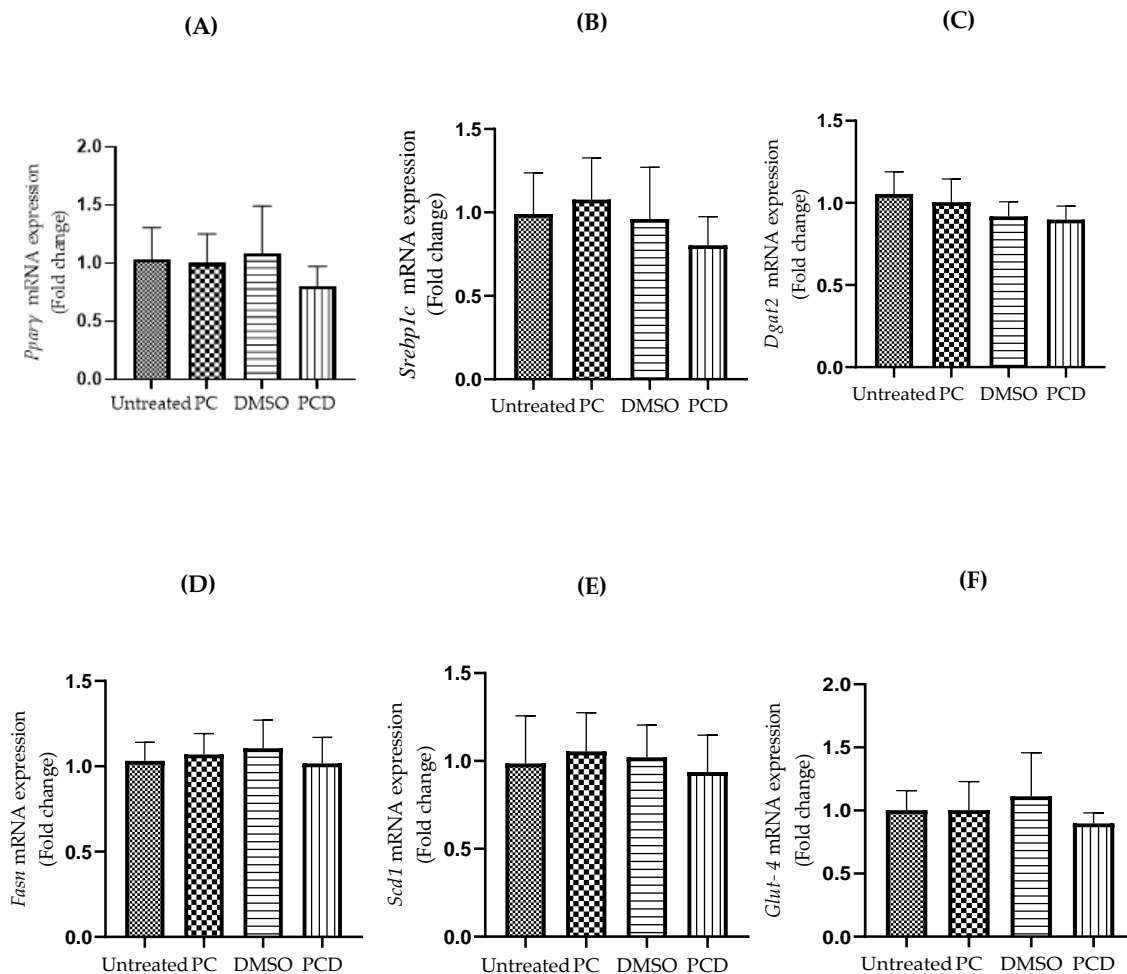

**Figure S1.** The cells were differentiated to mature adipocytes, for 8 days, as explained in the methods section. Total RNA was extracted, and the mRNA expression analysis of (A) Peroxisome proliferator-activated receptor (*Pparγ*), (B) sterol regulatory element-binding protein (*Srebp1c*), (C) diacylglycerol O-acyltransferase 2 (*Dgat2*), (D) Fatty acid synthase (*Fasn*), (E) Stearoyl-CoA desaturase-1 (*Scd1*), and (F) Glucose transporter type 4 (*Glut-4*) genes was performed. Expression of target genes was normalized to RPLP0 as the reference gene, and data were expressed as fold change. Vehicles: PC, DMSO, PCD. Data were analyzed using one-way ANOVA and Tukey's post-hoc test.  $p < 0.05$  was considered significant.  $n = 3$ . Untreated=Untreated cells, PC=L- $\alpha$ -phosphatidylcholine (30  $\mu\text{g/mL}$  culture medium), DMSO=dimethyl sulfoxide (0.06 %), PCD=PC+DMSO [(30  $\mu\text{g}$  + 0.06 %)/mL culture medium].

**Supplementary S2**

**Schematic of shrimp processing by-product extraction to prepare shrimp extract and shrimp oil**

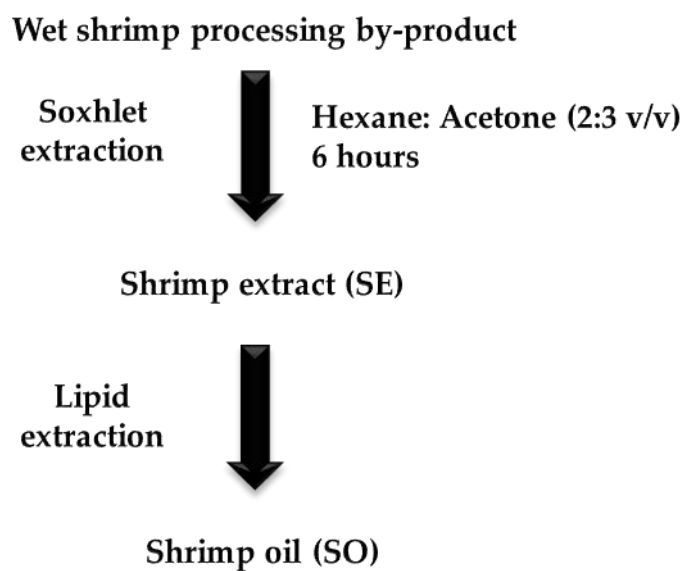

**Figure S2.** Schematic of shrimp processing by-product extraction to prepare shrimp extract and shrimp oil

**Supplementary S3**  
**Particle size analysis of oil emulsions**

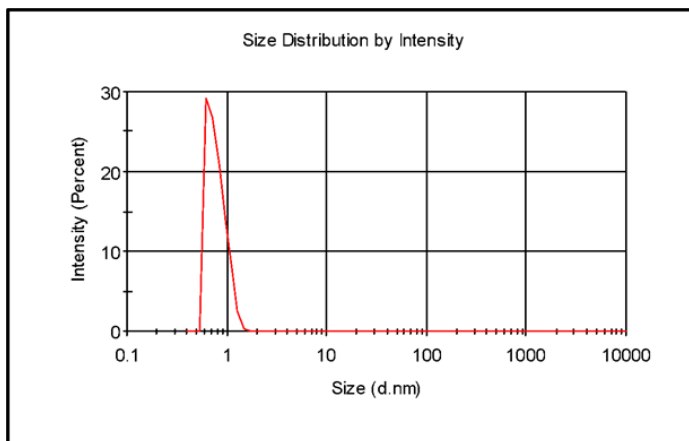

**Figure S3.** Analysis of particle size distribution of oil emulsions using dynamic light scattering (DLS). DLS measurements were carried out using a Zetasizer 1000Hs/3000Hs (Malvern Instruments, Worcestershire, U.K.) as described in the methods section. The data were expressed as the z-average (d. nm) and polydispersity index (PDI).

**Supplementary S4**  
**Effect of fish oil on adipogenesis in 3T3-L1 adipocytes**

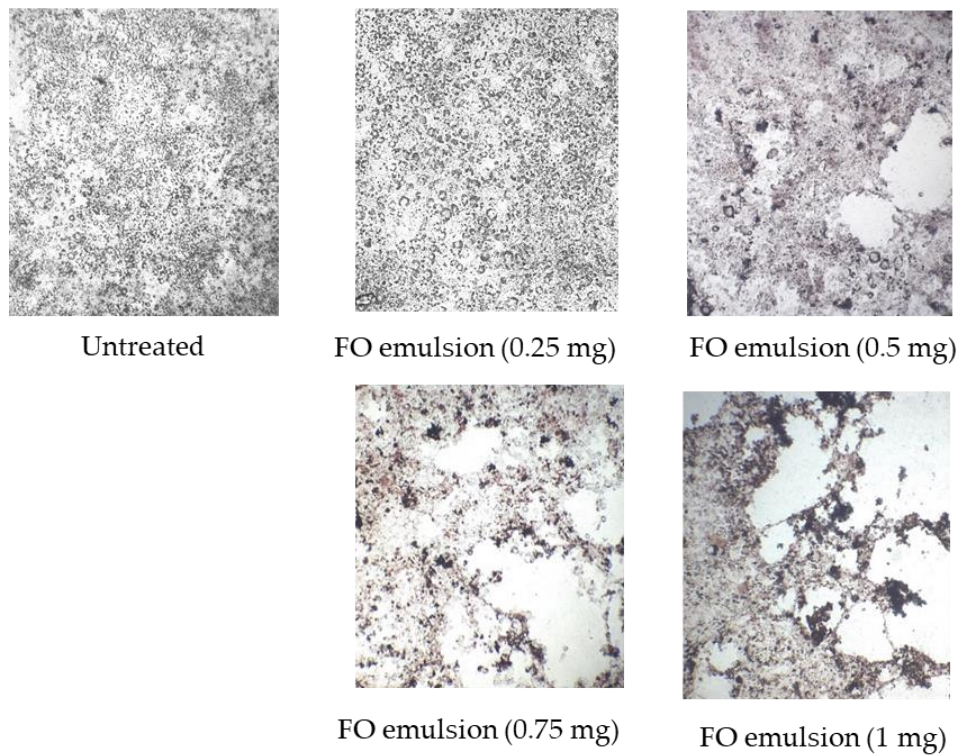

**Figure S4.** Preadipocytes were differentiated to mature adipocytes in the presence or absence of different concentrations of fish oil emulsions (0.25, 0.5, 0.75 and 1 mg/mL culture medium), for 8 days, as explained in the methods section. On day 8, the cells were viewed using a Leica DMIL LED Microscope at 40x magnification, and Infinity Camera Analyze Software (version 6.5.5) was used for capturing the images. Untreated=Untreated cells, FO=Fish oil.

# Supplementary S5

## Effect of lipid emulsions on the cell metabolic activity of 3T3-L1 preadipocytes

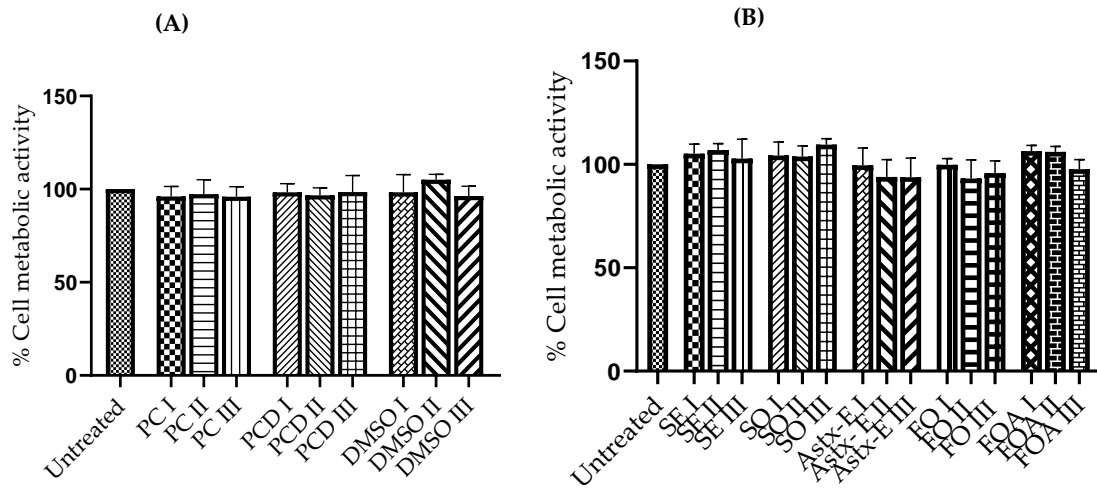

**Figure S5.** Cell metabolic activity of 3T3-L1 preadipocytes treated with various concentrations of treatments and vehicles. Cells were treated with various concentrations of treatments, and the vehicles, as explained in the methods section. **(A)** Vehicles: PC, DMSO, PCD; **(B)** Treatments: SE, SO, Astx-E, FO, and FO+Astx-E. Data were analyzed using one-way ANOVA to determine significance ( $P < 0.05$ ). Values are expressed as means  $\pm$  SD,  $n = 3$ . Untreated=Untreated cells, PC=L- $\alpha$ -phosphatidylcholine (I, II, III represents 15, 30, and 60  $\mu\text{g/mL}$  culture medium, respectively), PCD=PC+DMSO [(I, II, III represents 15  $\mu\text{g}$  + 0.03%, 30  $\mu\text{g}$  + 0.06%, 60  $\mu\text{g}$  + 0.1%)/mL culture medium, respectively], DMSO=dimethyl sulfoxide (I, II, III represents 0.03, 0.06, and 0.1%, respectively), SE=shrimp extract (I, II, III represents 0.125, 0.25, and 0.5 mg/mL culture medium, respectively), SO=shrimp oil (I, II, III represents 0.125, 0.25, 0.5 mg/mL culture medium, respectively), Astx-E=esterified astaxanthin (I, II, III represents 7.95, 15.9, and 31.8 ng/mL culture medium, respectively), FO=fish oil (I, II, III represents 0.125, 0.25, and 0.5 mg/mL culture medium, respectively), FOA= FO+Astx-E [(I, II, III represents 0.125 mg + 7.95 ng, 0.25 mg + 15.9 ng, 0.5 mg + 31.8 ng )/mL culture medium, respectively].

**Supplementary S6**

**Primer sequences for Real-time quantitative polymerase chain reaction**

**Table S1.** Primer sequences for Real-time quantitative polymerase chain reaction

| Gene           | Sequence                    |         | Ascension No   |
|----------------|-----------------------------|---------|----------------|
| <i>Pparγ</i>   | 5'-GAGCTGACCCAATGGTTGCTG-3' | Forward | XM_017321456.1 |
|                | 5'-GCTTCAATCGGATGGTTCTTC-3' | Reverse |                |
| <i>Srebp1c</i> | 5'-CGGCTCTGGAACAGACACTG-3'  | Forward | NM_001313979.1 |
|                | 5'-TGAGCTGGAGCATGTCTTCG-3'  | Reverse |                |
| <i>Scd1</i>    | 5'-CACCTGCCTCTTCGGGATTT-3'  | Forward | NM_009127.4    |
|                | 5'-CTTGACAGCCGGGTGTTTG-3'   | Reverse |                |
| <i>Dgat2</i>   | 5'-CTGCTGTTGGCTGGTTTCAC-3'  | Forward | NM_026384.3    |
|                | 5'-CAGGAGGATATGCGCCAGAG-3'  | Reverse |                |
| <i>Fasn</i>    | 5'-CTGCGGAACTTCAGGAAATG-3'  | Forward | NM_007988.3    |
|                | 5'-GGTTCGGAATGCTATCCAGG-3'  | Reverse |                |
| <i>Glut-4</i>  | 5'-GATTCTGCTGCCCTTCTGTC-3'  | Forward | AB_008453.1    |
|                | 5'-ATTGGACGCTCTCTCTCCAA-3'  | Reverse |                |
| <i>Rplp0</i>   | 5'-AATTTCAATGGTGCCTCTGG-3'  | Forward | NM_007475.5    |
|                | 5'-TCACTGTGCCAGCTCAGAAC-3'  | Reverse |                |

Primers used in qPCR were designed using NCBI primer blast and purchased from IDT Technologies. *Pparγ*: peroxisome proliferator-activated receptor-gamma; *Srebp1c*: sterol regulatory element-binding protein 1; *Scd1*: stearoyl-CoA desaturase 1; *Dgat2*: diacylglycerol O-acyltransferase 2; *Fasn*: fatty acid synthase; *Glut-4*: Glucose transporter type 4; *Rplp0*: ribosomal protein large.
